# Supplementary material
Source: PubMed Central journal article supplement (PMC4827623)
Supplement: NIHMS769751-supplement-Supplelmentary_Figure_4.pdf [file NIHMS769751-supplement-Supplelmentary_Figure_4.pdf]

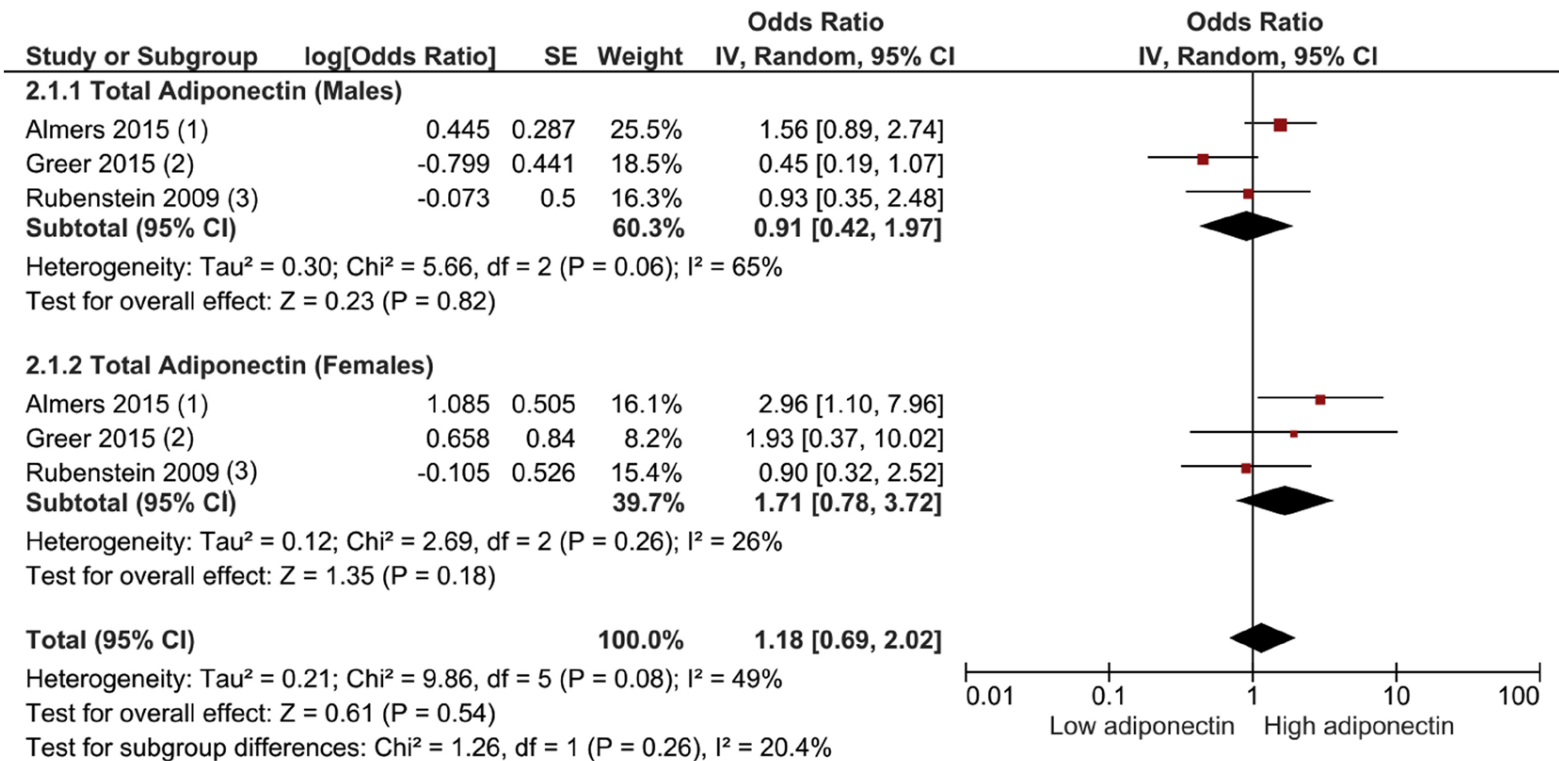

Footnotes

- (1) Adjusts for age, sex, race/ethnicity and WC
- (2) Adjusts for age, sex, race and WHR
- (3) Adjusts for age, sex, race, hiatal hernia and WHR
