# Supplementary material
Source: PubMed Central journal article supplement (PMC4827623)
Supplement: NIHMS769751-supplement-Supplementary_Figure_2.pdf [file NIHMS769751-supplement-Supplementary_Figure_2.pdf]

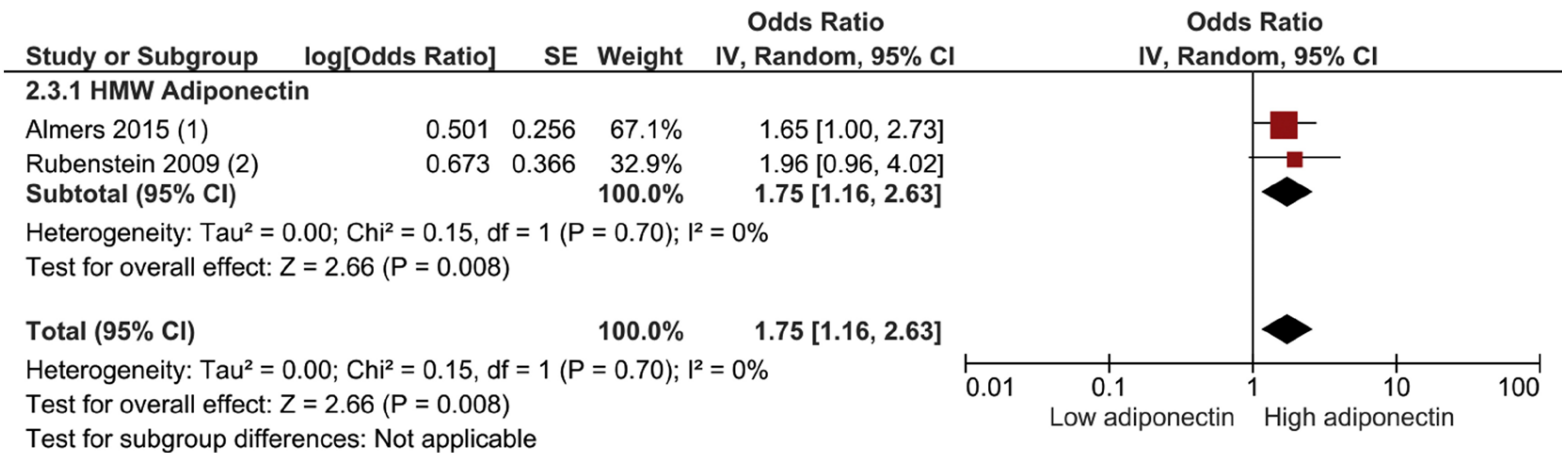

Footnotes

(1) Adjusts for age, sex, race/ethnicity and WC

(2) Adjusts for age, sex, race, hiatal hernia and WHR
